# Supplementary material
Source: PubMed Central journal article supplement (PMC2034219)
Supplement: pnas_0705338104_1.pdf [file pnas_0705338104_1.pdf]

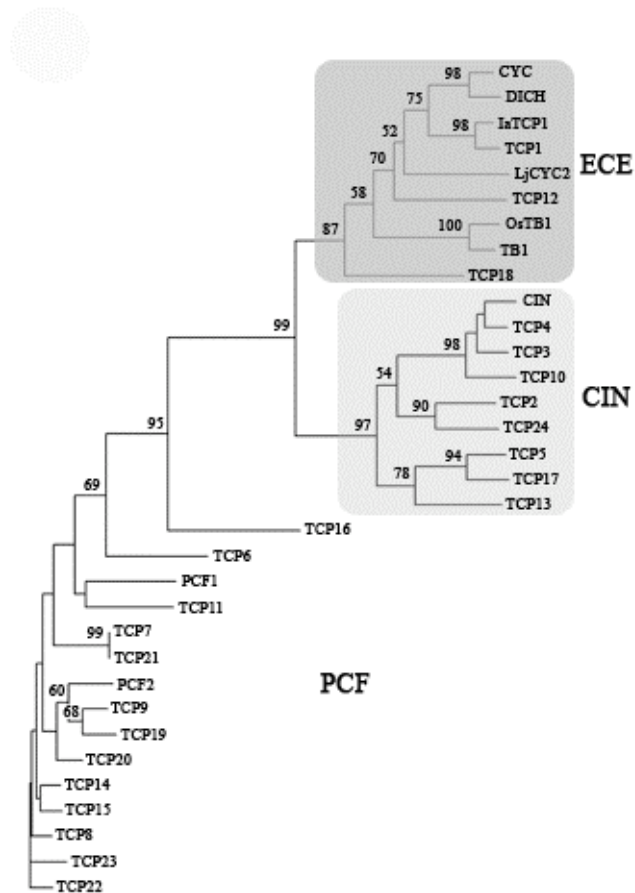

**SI Figure 6**

**Phylogenetic tree visualizing the orthology between *IaTCP1* and *TCP1***

TCP domains from *Iberis* (*IaTCP1*), *Arabidopsis* (TCP1-TCP24), *Antirrhinum* (CYC, DICH, CIN), *Oryza sativa* (OsTB1, PCF1, PCF2) and *Zea mays* (*TB1*) were aligned and a distance matrix was generated with the Neighbor-Joining Method provided by the DNAMAN software (version 4.0, Lynnon Biosoft Company). ECE, CIN and PCF clades are depicted and bootstrap results are shown for values greater than 50%.
